# Supplementary material
Source: PubMed Central journal article supplement (PMC2821048)

# SUPPLEMENTAL FIGURES

Figure S1: Manually validated spectra with PeptideProphet probability lower than 0.9.

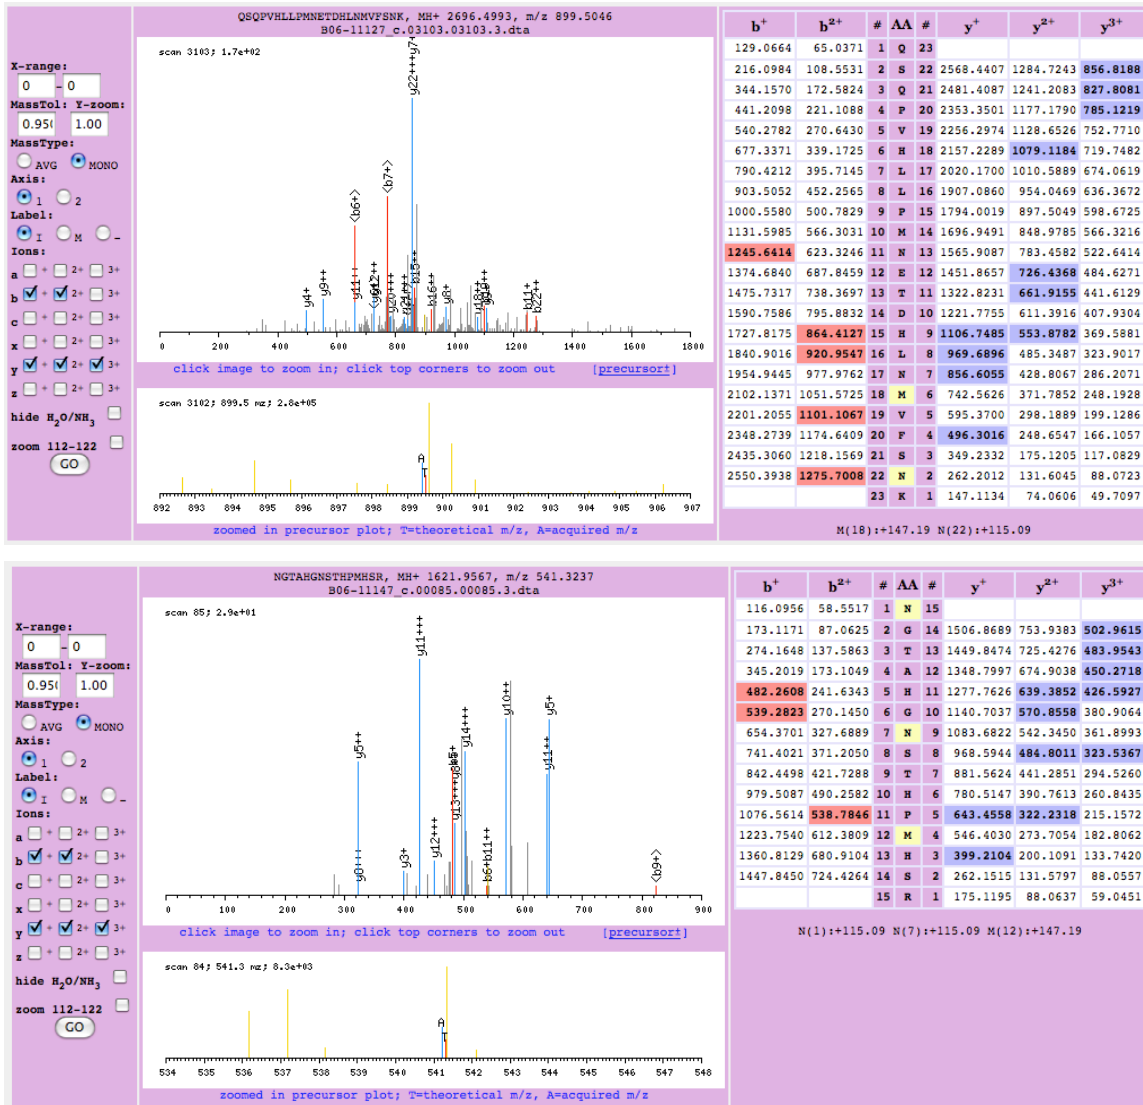

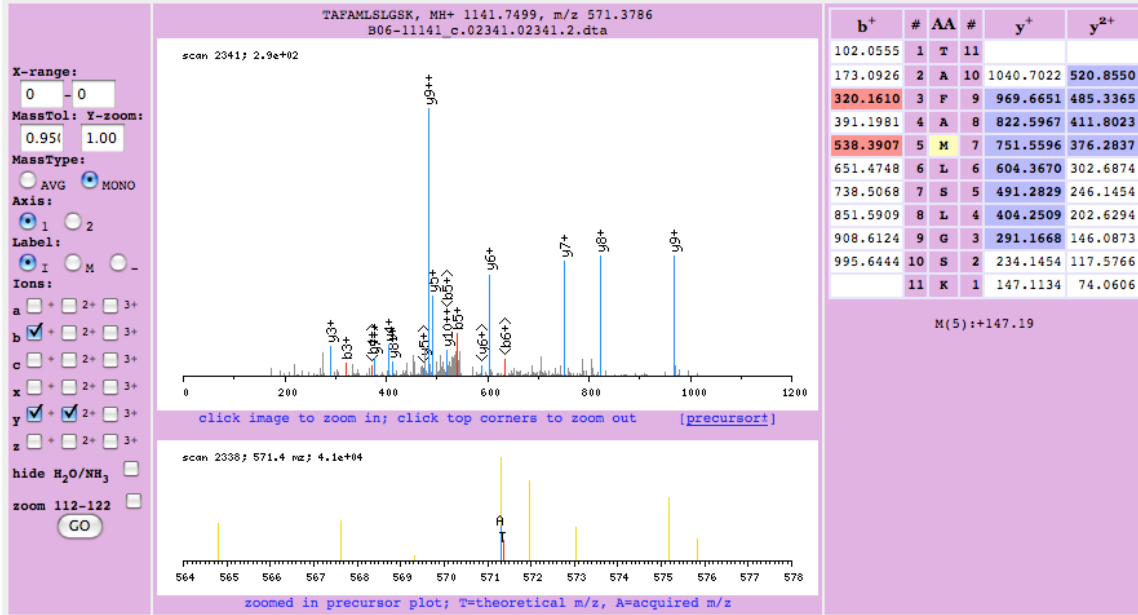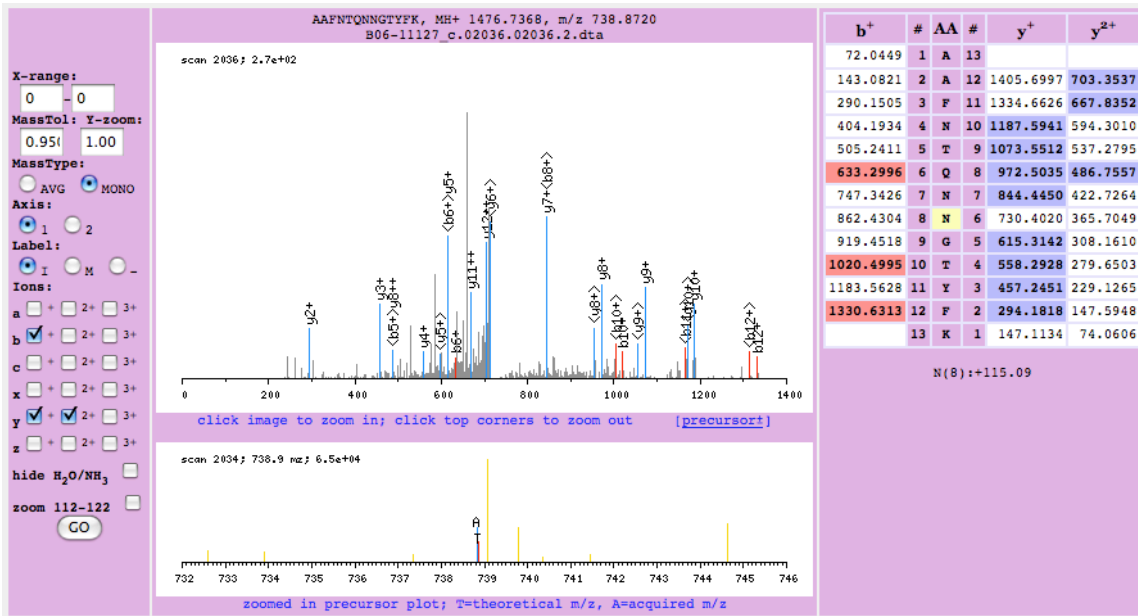

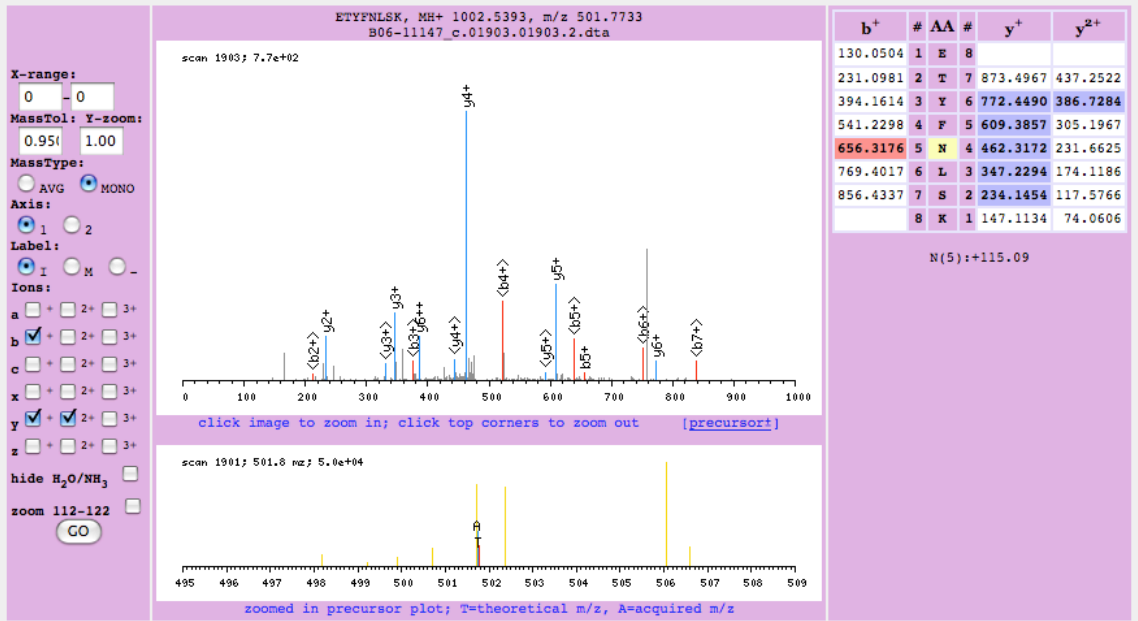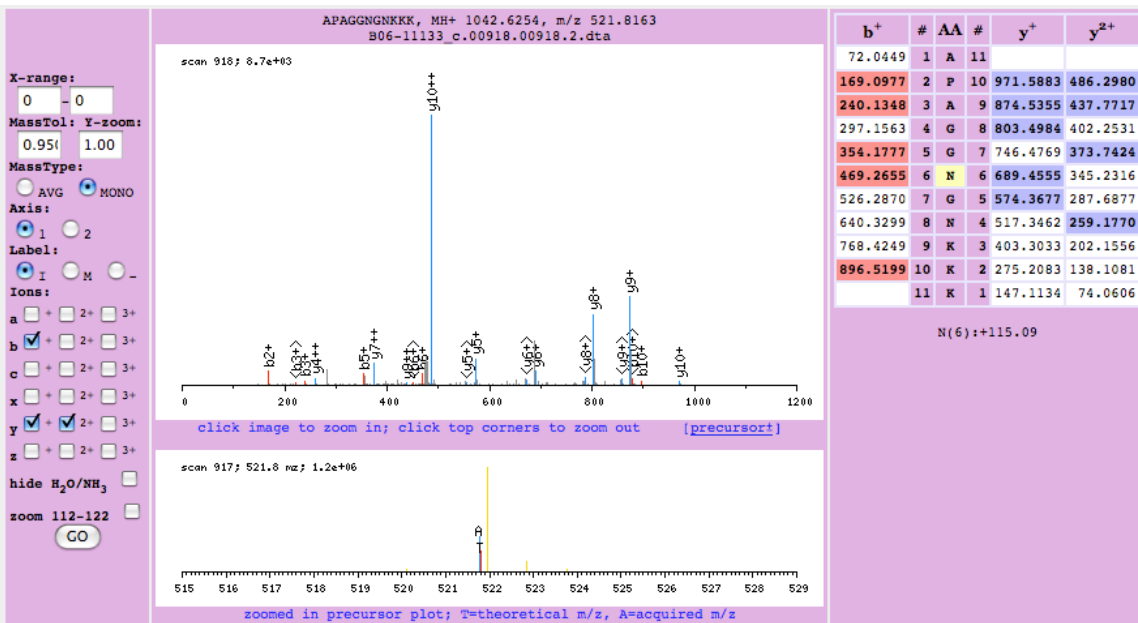

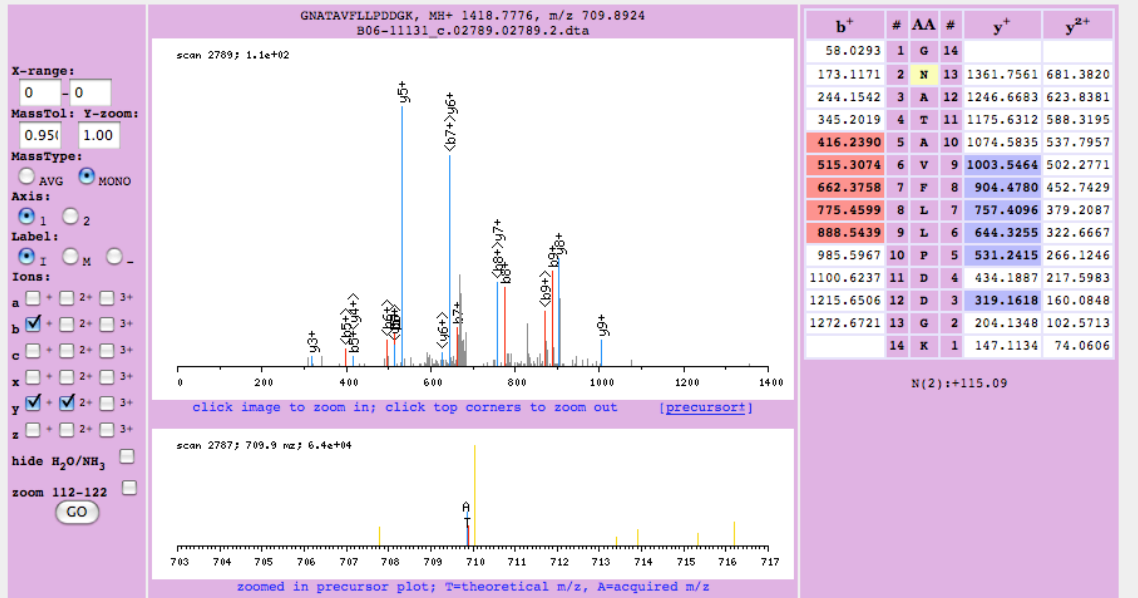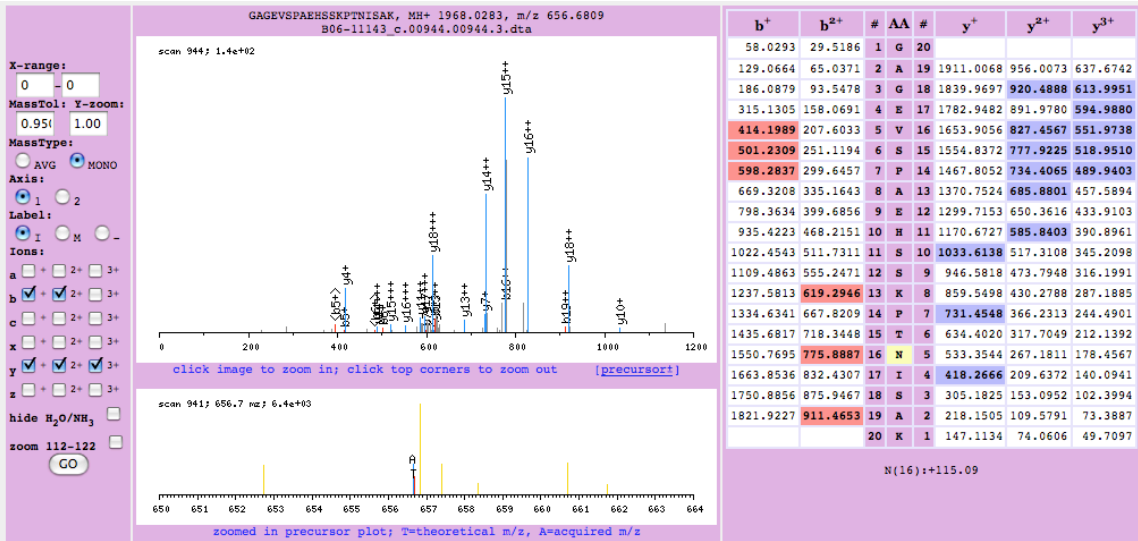

Supplement: NIHMS171636-supplement-Figure_S1.pdf [file NIHMS171636-supplement-Figure_S1.pdf]
